# Supplementary material for: Post-modification of poly(glycidyl methacrylate)s with alkyl amine and isothiocyanate for effective pDNA delivery
Source: Royal Society of Chemistry journal article supplement (doi:10.1039/c3py00573a), 2013-01-01
Supplement: c3py00573a.pdf [file c3py00573a.pdf]

## Post-modification of poly(glycidyl methacrylate)s with alkyl amine and isothiocyanate for effective pDNA delivery

Cui Li,<sup>a</sup> Ying-Wei Yang,<sup>b</sup> Zhi-xiang Liang,<sup>a</sup> Guo-lin Wu,<sup>c</sup> and Hui Gao<sup>a\*</sup>

<sup>a</sup>School of Chemistry and Chemical Engineering, Tianjin University of Technology, Tianjin, China 300384

<sup>b</sup>State Key Laboratory of Supramolecular Structure and Materials, College of Chemistry, Jilin University, 2699 Qianjin Street, Changchun, China 130012

<sup>c</sup>Key Laboratory of Functional Polymer Materials (Ministry of Education), Institute of Polymer Chemistry, Nankai University, Tianjin, China 300071

E-mail: ghhigher@hotmail.com; Fax: +86 2260214251; Tel: +86 2260214259

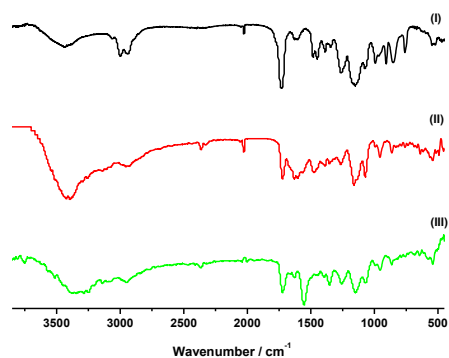

Fig. S1 FT-IR spectra of S5-PGMA (I), S5-E (II) and S5-EM2 (III)
